# Supplementary material
Source: Springer Nature journal article supplement (https://www.springermedizin.de/resource/supplementary/12969_2013_1004_MOESM2_ESM.pdf/9589190)
Supplement: MOESM2 [file 9589190]

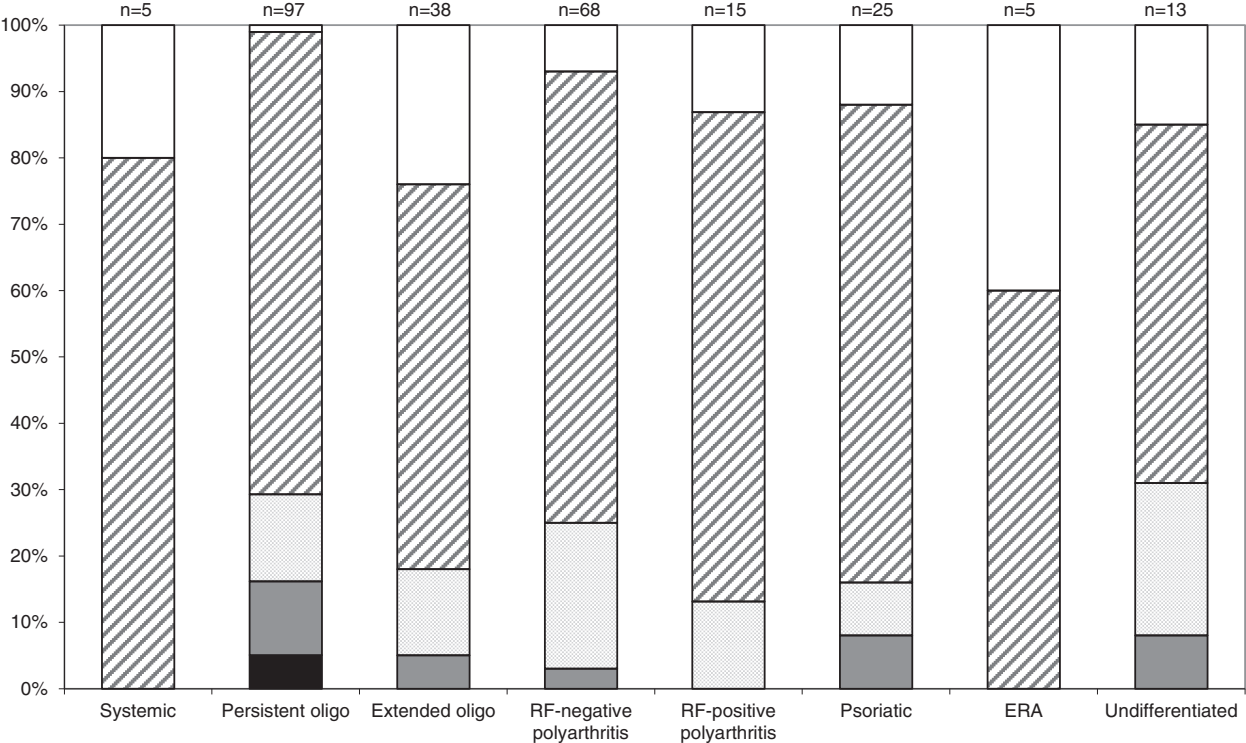

■ EU 5 = Remission   ■ EU 4 = Inactive without treatment   ■ EU 3 = Inactive with treatment   ■ EU 2 = Stable   □ EU 1 = Active disease
